# Supplementary material for: Catalytic olefin epoxidation over cobalt(ii)-containing mesoporous silica by molecular oxygen in dimethylformamide medium
Source: Royal Society of Chemistry journal article supplement (doi:10.1039/c4cy00084f), 2014-01-01
Supplement: c4cy00084f1.pdf [file c4cy00084f1.pdf]

## Supplementary information

### **Catalytic olefin epoxidation over cobalt(II) containing mesoporous silica by molecular oxygen in dimethylformamide medium**

**Susmita Bhunia, Sreyashi Jana, Debraj Saha, Buddhadeb Dutta and Subratanath**

**Koner\***

Department of Chemistry, Jadavpur University, Kolkata 700 032, India

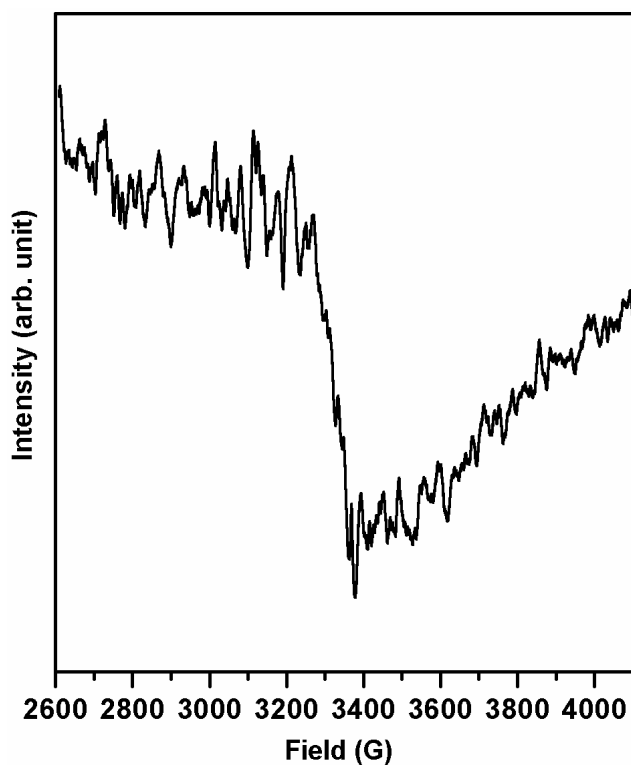

Figure S1. EPR spectrum of Co-MCM-41

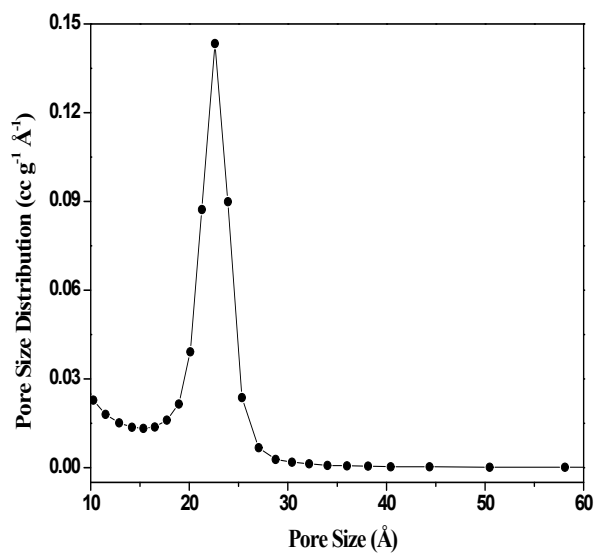

Figure S2. Pore size distribution of Si-MCM-41.

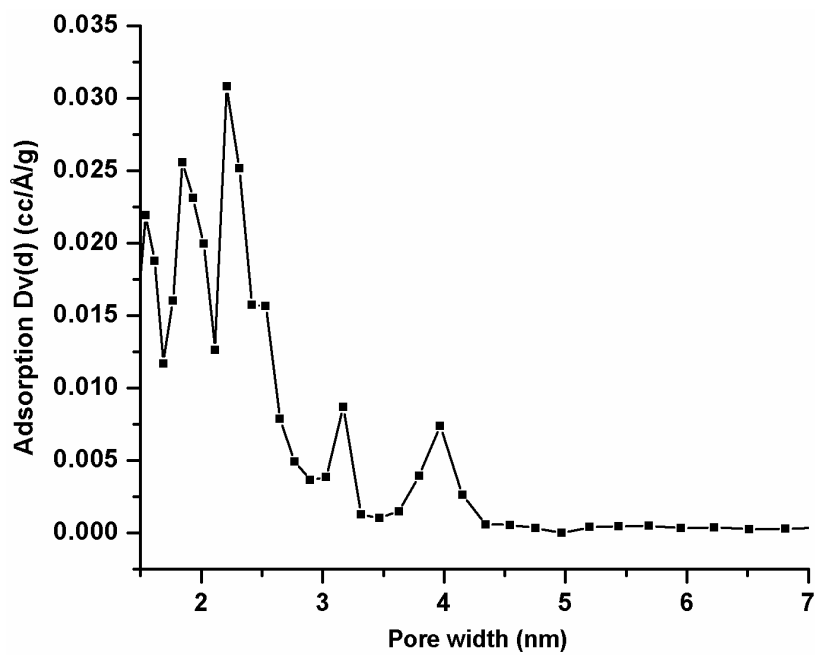

Figure S3. Pore size distribution of Co-MCM-41.
